# Supplementary material for: Long-Term Performance Evaluation of the Latest Multi-Source Weighted-Ensemble Precipitation (MSWEP) over the Highlands of Indo-Pak (1981–2009)
Source: MDPI journal article supplement (doi:10.3390/rs14194773), 2022-09-24
Supplement: s1 [file s1]

# Long-term performance evaluation of the latest Multi-Source Weighted-Ensemble Precipitation (MSWEP) over the highlands of Indo-Pak (1981-2009)

Sikandar Ali<sup>1,2</sup>, Yaning Chen<sup>1,2, \*</sup>, Muhammad Azmat<sup>3</sup>, Patient Mindje Kayumba<sup>1,2</sup>, Zeeshan Ahmed<sup>1</sup>, Richard Mind'je<sup>1, 2</sup>, Abdul Ghaffar<sup>2,4</sup>, Jinxiu Qin<sup>1, 2</sup> and Akash Tariq<sup>1</sup>

<sup>1</sup> State Key Laboratory of Desert and Oasis Ecology, Xinjiang Institute of Ecology and Geography, Chinese Academy of Sciences, Urumqi 830011, China

<sup>2</sup> University of Chinese Academy of Sciences, Beijing 100049, China

<sup>3</sup> Institute of Geographical Information Systems (IGIS), National University of Sciences and Technology (NUST), Islamabad 44000, Pakistan

<sup>4</sup> State Key Laboratory of Geomechanics and Geotechnical Engineering, Institute of Rock and Soil Mechanics, Chinese Academy of Sciences, Wuhan 430071, China

\* Correspondence: chenyn@ms.xjb.ac.cn; Tel.: +86-991-7823169;

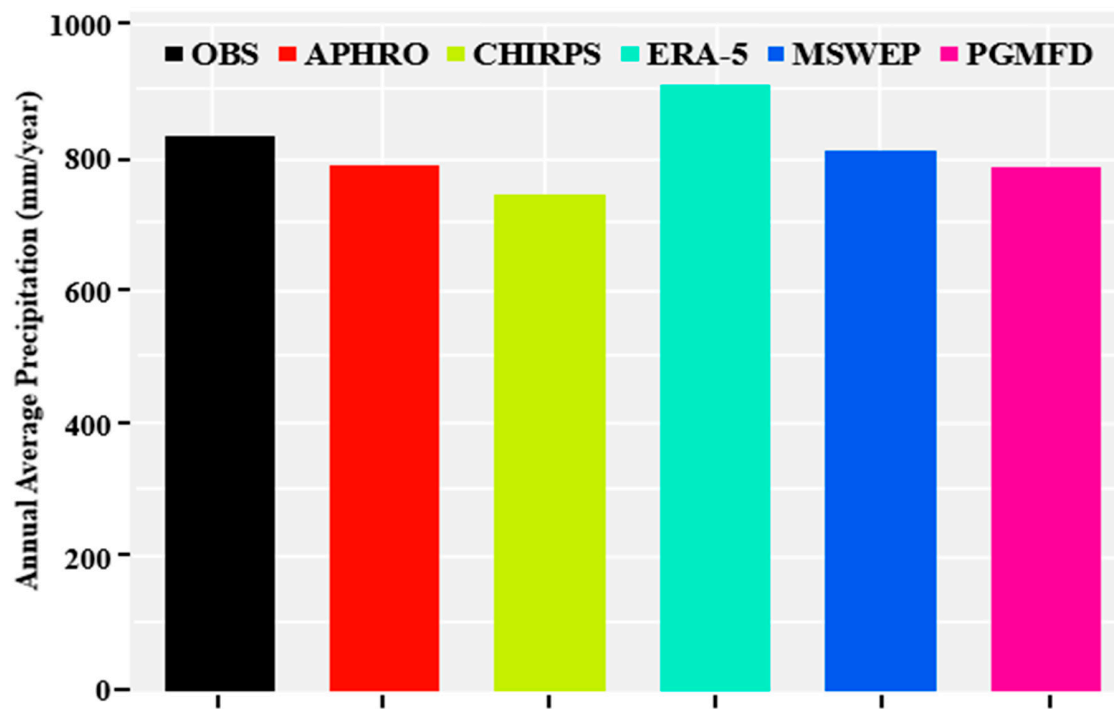

**Figure S1.** Annual average precipitation in JRB measured from five GPPs with reference gauges.

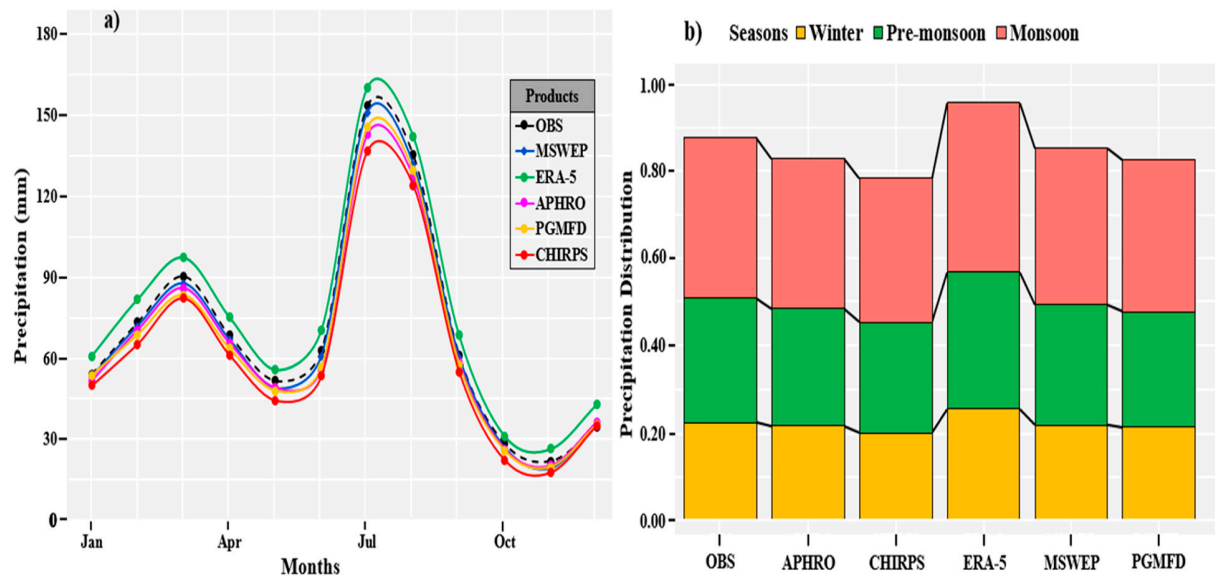

**Figure S2.** (a) Temporal precipitation distribution estimates derived from five GPPs and reference gauges at monthly scale. (b) Seasonal precipitation distribution derived from five GPPs and reference gauges in JRB during the entire study period.

**Table S1.** Geographical information of in-situ gauging stations used in the current study.

| S.no | Stations     | Latitude (dd) | Longitude (dd) | Elevation (m) |
|------|--------------|---------------|----------------|---------------|
| 1    | Mangla       | 33.15         | 73.69          | 335.00        |
| 2    | Planderi     | 33.73         | 73.76          | 1690.91       |
| 3    | Rawlakot     | 33.87         | 73.99          | 1944.82       |
| 4    | Muzaffarabad | 34.37         | 73.48          | 904.54        |
| 5    | Gharidopata  | 34.16         | 73.83          | 1018.07       |
| 6    | Kotli        | 33.50         | 73.90          | 600.23        |
| 7    | Narran       | 34.90         | 73.65          | 2426.20       |
| 8    | Balakot      | 34.55         | 73.35          | 1006.00       |
| 9    | Gujjar Khan  | 33.26         | 73.30          | 463.53        |
| 10   | Murree       | 33.90         | 73.40          | 1898.24       |
| 11   | Astore       | 35.20         | 74.51          | 5432.14       |
| 12   | Bagh         | 33.97         | 73.79          | 1089.48       |
| 13   | Burzil       | 34.91         | 75.09          | 4103.22       |
| 14   | Baramula     | 34.34         | 74.25          | 1668.27       |
| 15   | Srinagar     | 34.08         | 74.83          | 1593.54       |
| 16   | Pulwama      | 33.87         | 74.88          | 1669.65       |
| 17   | Anantnag     | 33.68         | 75.14          | 1621.52       |
| 18   | Gulmarg      | 34.00         | 74.33          | 3676.13       |
| 19   | Pahalgam     | 34.03         | 75.33          | 2397.04       |
| 20   | Wular lake   | 34.43         | 74.67          | 1944.26       |
| 21   | Gad Wali     | 33.64         | 75.37          | 2353.41       |
| 22   | Dras         | 34.52         | 75.31          | 3721.87       |

**Table S2.** The statistical metrics for performance evaluation of GPPs in contrast to in-situ gauges data during the entire study period 1981-2009 in five SBs at daily and winter (season) scales.

| GPPs |        | Daily |      |       |           |      |      |      | Winter |      |       |           |      |      |      |
|------|--------|-------|------|-------|-----------|------|------|------|--------|------|-------|-----------|------|------|------|
|      |        | CC    | RMSE | BIAS  | rBIAS (%) | POD  | FAR  | CSI  | CC     | RMSE | BIAS  | rBIAS (%) | POD  | FAR  | CSI  |
| I    | APHRO  | 0.40  | 6.35 | -1.39 | -35.36    | 0.35 | 0.60 | 0.23 | 0.50   | 6.77 | -0.58 | -9.49     | 0.39 | 0.64 | 0.32 |
|      | CHIRPS | 0.14  | 6.97 | -3.13 | -56.98    | 0.23 | 0.79 | 0.15 | 0.25   | 7.56 | -0.60 | -10.10    | 0.21 | 0.73 | 0.19 |
|      | ERA-5  | 0.41  | 6.23 | 0.98  | 28.45     | 0.38 | 0.60 | 0.29 | 0.50   | 6.75 | 0.95  | 38.83     | 0.36 | 0.66 | 0.30 |
|      | MSWEP  | 0.44  | 5.15 | -1.14 | -30.16    | 0.53 | 0.54 | 0.38 | 0.60   | 5.21 | -0.29 | -2.82     | 0.51 | 0.53 | 0.34 |
|      | PGMFD  | 0.30  | 6.36 | -1.98 | -40.96    | 0.33 | 0.62 | 0.22 | 0.33   | 6.99 | 0.88  | 22.52     | 0.24 | 0.66 | 0.20 |
| II   | APHRO  | 0.54  | 5.54 | -1.06 | -20.17    | 0.40 | 0.50 | 0.32 | 0.57   | 4.56 | -1.06 | -30.35    | 0.53 | 0.40 | 0.51 |
|      | CHIRPS | 0.37  | 5.73 | -2.20 | -39.95    | 0.32 | 0.72 | 0.21 | 0.40   | 5.20 | -1.12 | -29.32    | 0.32 | 0.53 | 0.38 |
|      | ERA-5  | 0.55  | 5.46 | -0.64 | -7.96     | 0.44 | 0.49 | 0.39 | 0.55   | 4.52 | -0.25 | -1.35     | 0.63 | 0.44 | 0.39 |
|      | MSWEP  | 0.55  | 4.67 | -0.51 | -17.42    | 0.61 | 0.43 | 0.47 | 0.68   | 2.89 | -1.02 | -29.21    | 0.67 | 0.31 | 0.56 |
|      | PGMFD  | 0.40  | 5.55 | -1.68 | -32.74    | 0.38 | 0.51 | 0.32 | 0.44   | 4.73 | -1.10 | -31.91    | 0.40 | 0.44 | 0.41 |
| III  | APHRO  | 0.56  | 4.60 | 0.31  | 3.06      | 0.50 | 0.42 | 0.42 | 0.52   | 4.98 | 1.84  | 54.10     | 0.51 | 0.52 | 0.42 |
|      | CHIRPS | 0.38  | 5.31 | 0.25  | 4.02      | 0.40 | 0.56 | 0.30 | 0.32   | 5.79 | 2.23  | 54.06     | 0.30 | 0.63 | 0.30 |
|      | ERA-5  | 0.60  | 4.49 | 2.81  | 61.64     | 0.52 | 0.43 | 0.48 | 0.60   | 4.96 | 1.85  | 69.95     | 0.54 | 0.40 | 0.48 |
|      | MSWEP  | 0.62  | 3.74 | 0.30  | 2.65      | 0.67 | 0.36 | 0.53 | 0.64   | 3.06 | 1.43  | 43.97     | 0.63 | 0.33 | 0.54 |
|      | PGMFD  | 0.49  | 4.62 | 0.32  | 3.93      | 0.46 | 0.45 | 0.34 | 0.38   | 5.18 | 1.86  | 55.72     | 0.28 | 0.53 | 0.29 |
| IV   | APHRO  | 0.62  | 3.80 | -0.62 | -15.87    | 0.60 | 0.33 | 0.54 | 0.65   | 2.26 | 0.27  | 8.34      | 0.74 | 0.20 | 0.65 |
|      | CHIRPS | 0.45  | 4.93 | -1.52 | -31.37    | 0.48 | 0.39 | 0.40 | 0.54   | 2.77 | 0.60  | 12.63     | 0.45 | 0.39 | 0.56 |
|      | ERA-5  | 0.61  | 3.76 | 0.98  | 28.45     | 0.58 | 0.28 | 0.62 | 0.69   | 2.00 | 0.92  | 37.23     | 0.81 | 0.21 | 0.66 |
|      | MSWEP  | 0.71  | 3.05 | -0.41 | -12.76    | 0.73 | 0.25 | 0.64 | 0.78   | 1.06 | 0.25  | 7.55      | 0.86 | 0.17 | 0.76 |
|      | PGMFD  | 0.56  | 3.82 | -0.96 | -20.98    | 0.56 | 0.32 | 0.36 | 0.55   | 2.34 | 0.63  | 19.04     | 0.55 | 0.24 | 0.63 |
| V    | APHRO  | 0.74  | 2.68 | -0.32 | -10.17    | 0.66 | 0.23 | 0.64 | 0.62   | 4.33 | 0.90  | 19.08     | 0.54 | 0.29 | 0.60 |
|      | CHIRPS | 0.59  | 3.28 | -0.98 | -24.97    | 0.53 | 0.27 | 0.47 | 0.49   | 4.61 | 1.50  | 35.87     | 0.32 | 0.46 | 0.50 |
|      | ERA-5  | 0.78  | 2.42 | 0.79  | 10.71     | 0.69 | 0.20 | 0.66 | 0.63   | 4.30 | 1.27  | 55.81     | 0.63 | 0.30 | 0.59 |
|      | MSWEP  | 0.81  | 2.10 | -0.31 | -8.52     | 0.80 | 0.16 | 0.71 | 0.73   | 2.19 | 0.87  | 17.76     | 0.73 | 0.26 | 0.63 |
|      | PGMFD  | 0.70  | 2.75 | -0.49 | -11.87    | 0.60 | 0.24 | 0.53 | 0.50   | 4.30 | 0.75  | 26.33     | 0.49 | 0.31 | 0.57 |

**Table S3.** The statistical metrics for performance evaluation of GPPs in contrast to in-situ gauges data during the entire study period 1981-2009 in five SBs together with pre-monsoon and monsoon seasons.

| GPPs | Daily  |      |      |           |        |      |      |      | Winter |      |           |        |      |      |      |
|------|--------|------|------|-----------|--------|------|------|------|--------|------|-----------|--------|------|------|------|
|      | CC     | RMSE | BIAS | rBIAS (%) | POD    | FAR  | CSI  | CC   | RMSE   | BIAS | rBIAS (%) | POD    | FAR  | CSI  |      |
| I    | APHRO  | 0.45 | 6.48 | -2.55     | -24.22 | 0.26 | 0.68 | 0.21 | 0.39   | 6.73 | -1.67     | -40.12 | 0.42 | 0.57 | 0.29 |
|      | CHIRPS | 0.23 | 7.07 | -2.82     | -49.96 | 0.18 | 0.82 | 0.14 | 0.25   | 7.69 | -3.05     | -48.58 | 0.18 | 0.71 | 0.19 |
|      | ERA-5  | 0.50 | 5.71 | 0.99      | 29.89  | 0.28 | 0.60 | 0.25 | 0.41   | 6.36 | -0.33     | -4.40  | 0.43 | 0.56 | 0.31 |
|      | MSWEP  | 0.50 | 4.89 | -2.30     | -23.41 | 0.45 | 0.51 | 0.35 | 0.40   | 6.30 | -1.20     | -32.63 | 0.46 | 0.54 | 0.33 |
|      | PGMFD  | 0.34 | 6.49 | -2.78     | -34.28 | 0.20 | 0.69 | 0.20 | 0.29   | 6.81 | -2.00     | -43.89 | 0.25 | 0.61 | 0.23 |
| II   | APHRO  | 0.57 | 4.56 | -1.75     | -15.59 | 0.48 | 0.46 | 0.46 | 0.58   | 4.54 | -0.85     | -25.72 | 0.58 | 0.41 | 0.50 |
|      | CHIRPS | 0.33 | 5.18 | -2.41     | -40.36 | 0.37 | 0.63 | 0.37 | 0.43   | 5.16 | -1.80     | -28.61 | 0.40 | 0.55 | 0.41 |
|      | ERA-5  | 0.58 | 4.51 | -0.04     | -0.97  | 0.51 | 0.43 | 0.48 | 0.60   | 4.10 | 0.88      | 30.34  | 0.61 | 0.39 | 0.52 |
|      | MSWEP  | 0.66 | 3.40 | -1.63     | -13.03 | 0.60 | 0.35 | 0.54 | 0.62   | 4.00 | -0.63     | -15.95 | 0.62 | 0.38 | 0.54 |
|      | PGMFD  | 0.48 | 4.71 | -1.97     | -24.28 | 0.38 | 0.47 | 0.44 | 0.51   | 4.61 | -0.96     | -27.99 | 0.46 | 0.44 | 0.45 |
| III  | APHRO  | 0.56 | 5.38 | -1.97     | -19.52 | 0.44 | 0.60 | 0.31 | 0.48   | 4.64 | 0.56      | 11.98  | 0.51 | 0.50 | 0.39 |
|      | CHIRPS | 0.29 | 6.20 | -2.50     | -42.51 | 0.29 | 0.75 | 0.28 | 0.33   | 5.65 | -0.25     | -3.99  | 0.29 | 0.63 | 0.38 |
|      | ERA-5  | 0.52 | 5.25 | 1.94      | 59.84  | 0.42 | 0.52 | 0.35 | 0.60   | 4.09 | 0.73      | 28.75  | 0.52 | 0.50 | 0.43 |
|      | MSWEP  | 0.58 | 3.84 | -1.90     | -15.24 | 0.52 | 0.43 | 0.44 | 0.61   | 4.00 | 0.55      | 10.95  | 0.55 | 0.47 | 0.53 |
|      | PGMFD  | 0.41 | 5.60 | -1.98     | -28.47 | 0.31 | 0.54 | 0.30 | 0.43   | 5.48 | -0.10     | 12.61  | 0.35 | 0.53 | 0.35 |
| IV   | APHRO  | 0.59 | 3.78 | -1.48     | -11.91 | 0.56 | 0.31 | 0.61 | 0.78   | 2.75 | -0.34     | -2.83  | 0.72 | 0.24 | 0.72 |
|      | CHIRPS | 0.35 | 4.15 | -2.42     | -38.31 | 0.46 | 0.52 | 0.42 | 0.61   | 2.88 | -0.96     | -15.33 | 0.56 | 0.35 | 0.62 |
|      | ERA-5  | 0.60 | 4.00 | 0.97      | 32.73  | 0.63 | 0.35 | 0.58 | 0.78   | 2.30 | 0.66      | 37.64  | 0.76 | 0.18 | 0.73 |
|      | MSWEP  | 0.72 | 3.31 | -1.48     | -11.87 | 0.67 | 0.26 | 0.68 | 0.80   | 2.21 | -0.34     | -2.78  | 0.78 | 0.17 | 0.75 |
|      | PGMFD  | 0.58 | 3.70 | -1.95     | -20.43 | 0.49 | 0.34 | 0.56 | 0.70   | 2.78 | -0.58     | -3.89  | 0.69 | 0.26 | 0.67 |
| V    | APHRO  | 0.64 | 2.54 | -1.02     | -6.98  | 0.70 | 0.20 | 0.71 | 0.68   | 4.24 | -0.57     | -14.03 | 0.68 | 0.30 | 0.64 |
|      | CHIRPS | 0.41 | 3.25 | -1.88     | -29.93 | 0.55 | 0.37 | 0.62 | 0.52   | 5.11 | -1.50     | -24.12 | 0.46 | 0.42 | 0.42 |
|      | ERA-5  | 0.66 | 3.01 | 0.97      | 39.92  | 0.73 | 0.26 | 0.72 | 0.62   | 3.62 | 1.19      | 58.72  | 0.71 | 0.29 | 0.64 |
|      | MSWEP  | 0.79 | 1.54 | -0.80     | -1.38  | 0.81 | 0.15 | 0.75 | 0.69   | 3.61 | -0.40     | -10.12 | 0.72 | 0.27 | 0.62 |
|      | PGMFD  | 0.64 | 2.98 | -1.15     | -14.12 | 0.58 | 0.24 | 0.67 | 0.64   | 3.35 | -1.16     | -15.78 | 0.59 | 0.35 | 0.59 |
